# Supplementary material for: On the Quality and Validity of Course Evaluation Questionnaires Used in Tertiary Education in Greece
Source: MDPI journal article supplement (doi:10.3390/higheredu3020013), 2024-04-12
Supplement: s1 [file s1]

# **Article: “On the Quality and Validity of Course Evaluation Questionnaires Used in Tertiary Education in Greece”**

## **Supplementary Material**

This report includes all the factor analyses performed for the article: "On the quality and validity of course evaluation questionnaires used in tertiary education in Greece". The datasets on which Exploratory and Confirmatory Factor Analyses were conducted are the following.

- a) No Lab-No AS/NT-No TS (3 factors, courses without laboratory, assignments and support teaching)
- b) No Lab-No AS/NT -TS (4 factors, courses without laboratory and assignments)
- c) No Lab- AS/NT - No TS (4 factors, courses without laboratory and support teaching)
- d) No Lab- AS/NT - TS (5 factors, courses without laboratory)
- e) Lab- No AS/NT – No TS (4 factors, courses without assignments and support teaching)
- f) Lab- No AS/NT –TS (5 factors, courses without assignments)
- g) Lab- AS/NT – No TS (5 factors, courses without support teaching)
- h) Lab- AS/NT –TS (all (6) factors)

The technical report is divided into two sections:

- a) Exploratory Factor analysis with two analyses, per dataset (Based on eigenvalues and on number of factors expected)
- b) Confirmatory factor analysis

## Exploratory Factor analysis

No Lab- No AS/NT – No TS dataset

Based on eigenvalues>1

|       | Factor |       | Uniqueness |
|-------|--------|-------|------------|
|       | 1      | 2     |            |
| var1  | 0.873  |       | 0.289      |
| var2  | 0.877  |       | 0.328      |
| var3  | 0.935  |       | 0.261      |
| var4  | 0.901  |       | 0.278      |
| var5  | 0.503  |       | 0.709      |
| var6  | 0.732  |       | 0.433      |
| var7  | 0.318  |       | 0.854      |
| var8  | 0.339  |       | 0.806      |
| var9  | 0.327  |       | 0.731      |
| var10 |        | 0.166 | 0.98       |
| var13 | 0.139  |       | 0.948      |
| var14 | 0.573  |       | 0.64       |
| var22 | 0.962  |       | 0.195      |
| var23 | 0.868  |       | 0.229      |
| var24 | 0.906  |       | 0.241      |
| var25 | 0.828  |       | 0.364      |
| var26 | 0.748  |       | 0.485      |
| var27 | 0.782  |       | 0.393      |
| var28 | 0.612  |       | 0.59       |
| var33 |        | 0.579 | 0.659      |
| var34 |        | 0.556 | 0.517      |
| var35 |        | 0.657 | 0.533      |
| var36 |        | 0.809 | 0.364      |
| var37 |        | 0.589 | 0.686      |

Based on number of factors expected (3)

|       | <b>Factor</b> |          |          | <b>Uniqueness</b> |
|-------|---------------|----------|----------|-------------------|
|       | <b>1</b>      | <b>2</b> | <b>3</b> |                   |
| var1  | 0.812         |          |          | 0.29              |
| var2  | 0.809         |          |          | 0.328             |
| var3  | 0.899         |          |          | 0.262             |
| var4  | 0.816         |          |          | 0.273             |
| var5  | 0.359         |          |          | 0.644             |
| var6  | 0.613         |          |          | 0.404             |
| var7  | 0.162         |          |          | 0.767             |
| var8  | 0.139         |          |          | 0.665             |
| var9  |               |          | 0.642    | 0.496             |
| var10 |               |          | 0.369    | 0.899             |
| var13 |               |          | 0.273    | 0.909             |
| var14 | 0.493         |          |          | 0.632             |
| var22 | 0.942         |          |          | 0.191             |
| var23 | 0.876         |          |          | 0.209             |
| var24 | 0.927         |          |          | 0.213             |
| var25 | 0.884         |          |          | 0.311             |
| var26 | 0.74          |          |          | 0.479             |
| var27 | 0.846         |          |          | 0.33              |
| var28 | 0.571         |          |          | 0.591             |
| var33 |               | 0.629    |          | 0.619             |
| var34 |               | 0.545    |          | 0.517             |
| var35 |               | 0.678    |          | 0.509             |
| var36 |               | 0.805    |          | 0.348             |
| var37 |               | 0.536    |          | 0.692             |

## No Lab- No AS/NT – TS dataset

Based on eigenvalues>1

|       | Factor |       | Uniqueness |
|-------|--------|-------|------------|
|       | 1      | 2     |            |
| var1  | 0.819  |       | 0.319      |
| var2  | 0.856  |       | 0.276      |
| var3  | 0.916  |       | 0.249      |
| var4  | 0.877  |       | 0.305      |
| var5  | 0.479  |       | 0.727      |
| var6  | 0.632  |       | 0.5        |
| var7  | 0.353  |       | 0.772      |
| var8  |        | 0.41  | 0.622      |
| var9  |        | 0.347 | 0.655      |
| var10 |        | 0.443 | 0.855      |
| var11 |        | 0.666 | 0.688      |
| var12 |        | 0.528 | 0.75       |
| var13 |        | 0.326 | 0.733      |
| var14 | 0.548  |       | 0.577      |
| var22 | 0.963  |       | 0.198      |
| var23 | 0.937  |       | 0.22       |
| var24 | 0.967  |       | 0.196      |
| var25 | 0.928  |       | 0.267      |
| var26 | 0.787  |       | 0.446      |
| var27 | 0.931  |       | 0.281      |
| var28 | 0.677  |       | 0.541      |
| var33 |        | 0.253 | 0.825      |
| var34 | 0.35   |       | 0.637      |
| var35 |        | 0.403 | 0.751      |
| var36 |        | 0.578 | 0.585      |
| var37 |        | 0.566 | 0.688      |

Based on number of factors expected (4)

|       | Factor |       |       |       | Uniqueness |
|-------|--------|-------|-------|-------|------------|
|       | 1      | 2     | 3     | 4     |            |
| var1  | 0.651  |       |       |       | 0.3209     |
| var2  | 0.643  |       |       |       | 0.2704     |
| var3  | 0.77   |       |       |       | 0.2521     |
| var4  | 0.67   |       |       |       | 0.3007     |
| var5  |        |       | 0.679 |       | 0.5833     |
| var6  |        |       | 0.723 |       | 0.354      |
| var7  |        |       | 0.689 |       | 0.6206     |
| var8  |        |       | 0.411 |       | 0.6063     |
| var9  |        |       | 0.359 |       | 0.6469     |
| var10 |        |       |       | 0.244 | 0.8627     |
| var11 |        |       |       | 1.092 | 0.0585     |
| var12 |        |       |       | 0.803 | 0.4339     |
| var13 |        |       | 0.317 |       | 0.7133     |
| var14 | 0.478  |       |       |       | 0.5629     |
| var22 | 0.907  |       |       |       | 0.1874     |
| var23 | 0.914  |       |       |       | 0.1916     |
| var24 | 0.935  |       |       |       | 0.1752     |
| var25 | 0.925  |       |       |       | 0.2395     |
| var26 | 0.738  |       |       |       | 0.4385     |
| var27 | 0.955  |       |       |       | 0.2409     |
| var28 | 0.616  |       |       |       | 0.5305     |
| var33 |        | 0.525 |       |       | 0.7058     |
| var34 |        | 0.637 |       |       | 0.4821     |
| var35 |        | 0.654 |       |       | 0.6018     |
| var36 |        | 0.908 |       |       | 0.2784     |
| var37 |        | 0.635 |       |       | 0.6046     |

## No Lab- AS/NT – No TS dataset

Based on eigenvalues>1

|       | Factor |        | Uniqueness |
|-------|--------|--------|------------|
|       | 1      | 2      |            |
| var1  | 0.856  |        | 0.268      |
| var2  | 0.912  |        | 0.243      |
| var3  | 0.949  | -0.117 | 0.21       |
| var4  | 0.912  |        | 0.236      |
| var5  | 0.574  | 0.143  | 0.558      |
| var6  | 0.729  |        | 0.402      |
| var7  | 0.477  |        | 0.717      |
| var8  | 0.489  | 0.19   | 0.622      |
| var9  | 0.402  | 0.264  | 0.651      |
| var10 |        | 0.162  | 0.982      |
| var13 | 0.186  |        | 0.942      |
| var14 | 0.64   |        | 0.533      |
| var15 | 0.666  |        | 0.493      |
| var16 | 0.694  |        | 0.475      |
| var17 | 0.529  |        | 0.669      |
| var18 | 0.902  |        | 0.235      |
| var19 | 0.932  |        | 0.194      |
| var20 | 0.71   |        | 0.491      |
| var21 | 0.82   |        | 0.264      |
| var22 | 0.965  | -0.124 | 0.186      |
| var23 | 0.93   |        | 0.205      |
| var24 | 0.955  | -0.119 | 0.201      |
| var25 | 0.892  |        | 0.289      |
| var26 | 0.826  |        | 0.362      |
| var27 | 0.876  |        | 0.276      |
| var28 | 0.666  |        | 0.519      |
| var33 |        | 0.5    | 0.69       |
| var34 | 0.213  | 0.65   | 0.379      |
| var35 |        | 0.681  | 0.459      |
| var36 |        | 0.648  | 0.501      |

Based on number of factors expected (4)

|       | Factor |       |       |       | Uniqueness |
|-------|--------|-------|-------|-------|------------|
|       | 1      | 2     | 3     | 4     |            |
| var1  | 0.776  |       |       |       | 0.263      |
| var2  | 0.913  |       |       |       | 0.225      |
| var3  | 1      |       |       |       | 0.18       |
| var4  | 0.943  |       |       |       | 0.206      |
| var5  |        |       | 0.362 |       | 0.509      |
| var6  | 0.572  |       |       |       | 0.346      |
| var7  |        |       | 0.768 |       | 0.377      |
| var8  |        |       | 0.403 |       | 0.544      |
| var9  |        |       | 0.417 |       | 0.559      |
| var10 |        |       | 0.266 |       | 0.939      |
| var13 |        |       | 0.214 |       | 0.921      |
| var14 | 0.395  |       |       |       | 0.529      |
| var15 |        |       |       | 0.561 | 0.394      |
| var16 |        |       |       | 0.697 | 0.3        |
| var17 |        |       | 0.655 |       | 0.396      |
| var18 | 0.521  |       |       |       | 0.185      |
| var19 | 0.663  |       |       |       | 0.176      |
| var20 | 0.397  |       |       |       | 0.472      |
| var21 | 0.49   |       |       |       | 0.249      |
| var22 | 1.047  |       |       |       | 0.144      |
| var23 | 1.02   |       |       |       | 0.16       |
| var24 | 1.05   |       |       |       | 0.156      |
| var25 | 0.855  |       |       |       | 0.271      |
| var26 | 0.678  |       |       |       | 0.339      |
| var27 | 0.769  |       |       |       | 0.243      |
| var37 | 0.561  |       |       |       | 0.519      |
| var33 |        | 0.626 |       |       | 0.498      |
| var34 |        | 0.787 |       |       | 0.395      |
| var35 |        | 0.67  |       |       | 0.362      |
| var36 |        | 0.664 |       |       | 0.591      |

## No Lab- AS/NT – TS dataset

Based on eigenvalues>1

|       | Factor |       | Uniqueness |
|-------|--------|-------|------------|
|       | 1      | 2     |            |
| var1  | 0.862  |       | 0.258      |
| var2  | 0.875  |       | 0.243      |
| var3  | 0.899  |       | 0.223      |
| var4  | 0.88   |       | 0.236      |
| var5  | 0.654  |       | 0.483      |
| var6  | 0.756  |       | 0.344      |
| var7  | 0.531  |       | 0.546      |
| var8  | 0.518  |       | 0.477      |
| var9  | 0.522  |       | 0.472      |
| var10 |        | 0.801 | 0.422      |
| var11 |        | 0.719 | 0.449      |
| var12 | 0.676  |       | 0.397      |
| var13 | 0.771  |       | 0.379      |
| var14 | 0.766  |       | 0.391      |
| var15 | 0.59   |       | 0.476      |
| var16 | 0.879  |       | 0.24       |
| var17 | 0.898  |       | 0.216      |
| var18 | 0.704  |       | 0.419      |
| var19 | 0.811  |       | 0.293      |
| var20 | 0.941  |       | 0.177      |
| var21 | 0.904  |       | 0.223      |
| var22 | 0.933  |       | 0.2        |
| var23 | 0.904  |       | 0.249      |
| var24 | 0.862  |       | 0.313      |
| var25 | 0.896  |       | 0.262      |
| var26 | 0.65   |       | 0.451      |
| var27 | 0.422  |       | 0.715      |
| var28 | 0.52   |       | 0.583      |
| var33 | 0.458  |       | 0.649      |
| var34 |        | 0.422 | 0.598      |
| var35 |        | 0.495 | 0.618      |
| var36 | 0.5    |       | 0.491      |
| var37 |        | 0.524 | 0.642      |

Based on number of factors expected (5)

|       | <b>Factor</b> |          |          |          |          |       |
|-------|---------------|----------|----------|----------|----------|-------|
|       | <b>1</b>      | <b>2</b> | <b>3</b> | <b>4</b> | <b>5</b> |       |
| var1  | 0.719         |          |          |          |          | 0.238 |
| var2  | 0.759         |          |          |          |          | 0.214 |
| var3  | 0.861         |          |          |          |          | 0.181 |
| var4  | 0.77          |          |          |          |          | 0.206 |
| var5  | 0.387         |          |          |          |          | 0.419 |
| var6  | 0.539         |          |          |          |          | 0.274 |
| var7  |               | 0.282    |          |          |          | 0.391 |
| var8  | 0.329         |          |          |          |          | 0.439 |
| var9  | 0.364         |          |          |          |          | 0.448 |
| var10 |               |          |          | 0.386    |          | 0.618 |
| var11 |               |          |          | 0.975    |          | 0.123 |
| var12 |               |          |          | 0.851    |          | 0.246 |
| var13 |               |          |          | 0.255    |          | 0.488 |
| var14 | 0.366         |          |          |          |          | 0.393 |
| var15 |               | 0.787    |          |          |          | 0.257 |
| var16 |               | 0.859    |          |          |          | 0.233 |
| var17 |               | 0.673    |          |          |          | 0.327 |
| var18 |               | 0.684    |          |          |          | 0.157 |
| var19 |               | 0.611    |          |          |          | 0.151 |
| var20 |               | 0.656    |          |          |          | 0.343 |
| var21 |               | 0.67     |          |          |          | 0.221 |
| var22 | 0.896         |          |          |          |          | 0.137 |
| var23 | 0.91          |          |          |          |          | 0.157 |
| var24 | 0.932         |          |          |          |          | 0.142 |
| var25 | 0.834         |          |          |          |          | 0.211 |
| var26 | 0.69          |          |          |          |          | 0.308 |
| var27 | 0.787         |          |          |          |          | 0.229 |
| var28 | 0.402         |          |          |          |          | 0.453 |
| var33 |               |          | 0.745    |          |          | 0.437 |
| var34 |               |          | 0.712    |          |          | 0.348 |
| var35 |               |          | 0.809    |          |          | 0.311 |
| var36 |               |          | 0.704    |          |          | 0.44  |
| var37 |               |          | 0.568    |          |          | 0.563 |

---

## Lab- No AS/NT – No TS dataset

Based on eigenvalues>1

|       | Factor |       | Uniqueness |
|-------|--------|-------|------------|
|       | 1      | 2     |            |
| var1  | 0.852  |       | 0.305      |
| var2  | 0.762  |       | 0.405      |
| var3  | 0.915  |       | 0.235      |
| var4  | 0.867  |       | 0.267      |
| var5  | 0.466  |       | 0.692      |
| var6  | 0.654  |       | 0.494      |
| var7  | 0.346  |       | 0.787      |
| var8  | 0.355  |       | 0.764      |
| var9  | 0.224  |       | 0.842      |
| var10 |        | 0.312 | 0.913      |
| var13 |        | 0.224 | 0.945      |
| var14 | 0.616  |       | 0.505      |
| var22 | 0.901  |       | 0.242      |
| var23 | 0.925  |       | 0.248      |
| var24 | 0.952  |       | 0.202      |
| var25 | 0.842  |       | 0.326      |
| var26 | 0.676  |       | 0.539      |
| var27 | 0.845  |       | 0.394      |
| var28 | 0.522  |       | 0.665      |
| var29 |        | 0.682 | 0.63       |
| var30 |        | 0.733 | 0.257      |
| var31 |        | 0.689 | 0.259      |
| var32 |        | 0.656 | 0.479      |
| var33 | 0.344  |       | 0.904      |
| var34 |        | 0.533 | 0.761      |
| var35 |        | 0.246 | 0.851      |
| var36 | 0.231  |       | 0.905      |
| var37 | 0.196  |       | 0.925      |

Based on number of factors expected (4)

|       | Factor |       |       |       | Uniqueness |
|-------|--------|-------|-------|-------|------------|
|       | 1      | 2     | 3     | 4     |            |
| var1  | 0.874  |       |       |       | 0.293      |
| var2  | 0.759  |       |       |       | 0.398      |
| var3  | 0.93   |       |       |       | 0.229      |
| var4  | 0.858  |       |       |       | 0.266      |
| var5  | 0.48   |       |       |       | 0.672      |
| var6  | 0.633  |       |       |       | 0.478      |
| var7  | 0.267  |       |       |       | 0.762      |
| var8  |        |       |       | 0.501 | 0.575      |
| var9  |        |       |       | 0.475 | 0.69       |
| var10 |        |       |       | 0.66  | 0.616      |
| var13 |        |       |       | 0.251 | 0.913      |
| var14 | 0.594  |       |       |       | 0.493      |
| var22 | 0.887  |       |       |       | 0.244      |
| var23 | 0.895  |       |       |       | 0.241      |
| var24 | 0.955  |       |       |       | 0.172      |
| var25 | 0.831  |       |       |       | 0.32       |
| var26 | 0.716  |       |       |       | 0.485      |
| var27 | 0.813  |       |       |       | 0.372      |
| var28 | 0.525  |       |       |       | 0.664      |
| var29 |        | 0.463 |       |       | 0.609      |
| var30 |        | 0.859 |       |       | 0.142      |
| var31 |        | 0.856 |       |       | 0.119      |
| var32 |        | 0.718 |       |       | 0.428      |
| var33 |        |       | 0.372 |       | 0.787      |
| var34 |        | 0.579 |       |       | 0.719      |
| var35 |        |       | 0.338 |       | 0.768      |
| var36 |        |       | 0.911 |       | 0.242      |
| var37 |        |       | 0.711 |       | 0.518      |

## Lab- No AS/NT – TS dataset

Based on eigenvalues>1

|       | Factor |       |       | Uniqueness |
|-------|--------|-------|-------|------------|
|       | 1      | 2     | 3     |            |
| var1  | 0.761  |       |       | 0.365      |
| var2  | 0.759  |       |       | 0.316      |
| var3  | 0.859  |       |       | 0.256      |
| var4  | 0.801  |       |       | 0.322      |
| var5  | 0.46   |       |       | 0.715      |
| var6  | 0.574  |       |       | 0.532      |
| var7  |        | 0.318 |       | 0.84       |
| var8  |        | 0.508 |       | 0.636      |
| var9  |        | 0.457 |       | 0.589      |
| var10 |        | 0.54  |       | 0.707      |
| var11 |        | 0.61  |       | 0.655      |
| var12 |        | 0.474 |       | 0.565      |
| var13 |        | 0.321 |       | 0.792      |
| var14 | 0.452  |       |       | 0.606      |
| var22 | 0.89   |       |       | 0.173      |
| var23 | 0.899  |       |       | 0.21       |
| var24 | 0.91   |       |       | 0.225      |
| var25 | 0.832  |       |       | 0.33       |
| var26 | 0.724  |       |       | 0.454      |
| var27 | 0.848  |       |       | 0.325      |
| var28 | 0.552  |       |       | 0.581      |
| var29 |        | 0.536 |       | 0.691      |
| var30 | 0.491  |       |       | 0.392      |
| var31 | 0.536  |       |       | 0.404      |
| var32 |        | 0.457 |       | 0.61       |
| var33 |        |       | 0.663 | 0.431      |
| var34 |        |       | 0.231 | 0.869      |
| var35 |        |       | 0.517 | 0.622      |
| var36 |        |       | 0.66  | 0.459      |
| var37 |        |       | 0.534 | 0.67       |

Based on number of factors expected (5)

|       | Factor |       |       |       |       | Uniqueness |
|-------|--------|-------|-------|-------|-------|------------|
|       | 1      | 2     | 3     | 4     | 5     |            |
| var1  | 0.666  |       |       |       |       | 0.3622     |
| var2  | 0.745  |       |       |       |       | 0.315      |
| var3  | 0.777  |       |       |       |       | 0.257      |
| var4  | 0.741  |       |       |       |       | 0.3206     |
| var5  |        |       |       |       | 0.575 | 0.5747     |
| var6  |        |       |       |       | 1.029 | 0.0285     |
| var7  |        |       |       |       | 0.274 | 0.7906     |
| var8  |        |       | 0.634 |       |       | 0.5734     |
| var9  |        |       | 0.59  |       |       | 0.5006     |
| var10 |        |       | 0.647 |       |       | 0.6586     |
| var11 |        |       | 0.681 |       |       | 0.5859     |
| var12 |        |       | 0.465 |       |       | 0.5115     |
| var13 |        |       | 0.26  |       |       | 0.7769     |
| var14 | 0.376  |       |       |       |       | 0.6092     |
| var22 | 0.893  |       |       |       |       | 0.1631     |
| var23 | 0.911  |       |       |       |       | 0.2009     |
| var24 | 0.908  |       |       |       |       | 0.2227     |
| var25 | 0.931  |       |       |       |       | 0.2946     |
| var26 | 0.837  |       |       |       |       | 0.3971     |
| var27 | 0.929  |       |       |       |       | 0.2988     |
| var28 | 0.531  |       |       |       |       | 0.5701     |
| var29 |        | 0.465 |       |       |       | 0.6532     |
| var30 |        | 0.787 |       |       |       | 0.2096     |
| var31 |        | 0.826 |       |       |       | 0.176      |
| var32 |        | 0.651 |       |       |       | 0.5278     |
| var33 |        |       |       | 0.727 |       | 0.3903     |
| var34 |        |       |       | 0.467 |       | 0.6707     |
| var35 |        |       |       | 0.717 |       | 0.4496     |
| var36 |        |       |       | 0.646 |       | 0.4775     |
| var37 |        |       |       | 0.496 |       | 0.685      |

## Lab- AS/NT – No TS dataset

Based on eigenvalues>1

|       | Factor |       |       | Uniqueness |
|-------|--------|-------|-------|------------|
|       | 1      | 2     | 3     |            |
| var1  | 0.869  |       |       | 0.256      |
| var2  | 0.873  |       |       | 0.28       |
| var3  | 0.911  |       |       | 0.24       |
| var4  | 0.919  |       |       | 0.227      |
| var5  | 0.506  |       |       | 0.592      |
| var6  | 0.611  |       |       | 0.407      |
| var7  | 0.453  |       |       | 0.683      |
| var8  | 0.367  |       |       | 0.68       |
| var9  |        |       | 0.299 | 0.687      |
| var10 | -0.252 |       |       | 0.943      |
| var13 |        |       | 0.111 | 0.956      |
| var14 | 0.654  |       |       | 0.488      |
| var15 | 0.716  |       |       | 0.45       |
| var16 | 0.729  |       |       | 0.437      |
| var17 | 0.532  |       |       | 0.624      |
| var18 | 0.846  |       |       | 0.253      |
| var19 | 0.888  |       |       | 0.2        |
| var20 | 0.695  |       |       | 0.458      |
| var21 | 0.838  |       |       | 0.27       |
| var22 | 0.934  |       |       | 0.193      |
| var23 | 0.927  |       |       | 0.204      |
| var24 | 0.941  |       |       | 0.184      |
| var25 | 0.841  |       |       | 0.285      |
| var26 | 0.881  |       |       | 0.303      |
| var27 | 0.871  |       |       | 0.307      |
| var28 | 0.518  |       |       | 0.513      |
| var29 |        | 0.604 |       | 0.686      |
| var30 |        | 0.835 |       | 0.124      |
| var31 |        | 0.812 |       | 0.161      |
| var32 |        | 0.842 |       | 0.267      |
| var33 |        |       | 0.647 | 0.522      |
| var34 |        | 0.561 |       | 0.576      |
| var35 |        |       | 0.617 | 0.576      |
| var36 |        |       | 0.718 | 0.517      |
| var37 |        |       | 0.516 | 0.779      |

Based on number of factors expected (5)

|       | Factor |       |        |       |        | Uniqueness |
|-------|--------|-------|--------|-------|--------|------------|
|       | 1      | 2     | 3      | 4     | 5      |            |
| var1  | 0.783  |       |        |       |        | 0.252      |
| var2  | 0.781  |       |        |       |        | 0.277      |
| var3  | 0.987  |       |        |       |        | 0.2        |
| var4  | 0.847  |       |        |       |        | 0.219      |
| var5  |        | 0.5   |        |       |        | 0.52       |
| var6  | 0.386  |       |        |       |        | 0.383      |
| var7  |        | 0.882 |        |       |        | 0.414      |
| var8  |        | 0.399 |        |       |        | 0.622      |
| var9  |        | 0.337 |        |       |        | 0.635      |
| var10 |        |       |        |       | -0.221 | 0.912      |
| var13 |        |       | 0.1452 |       |        | 0.954      |
| var14 | 0.43   |       |        |       |        | 0.482      |
| var15 |        |       |        |       | 0.676  | 0.264      |
| var16 |        |       |        |       | 0.773  | 0.19       |
| var17 |        | 0.874 |        |       |        | 0.366      |
| var18 | 0.522  |       |        |       |        | 0.237      |
| var19 | 0.656  |       |        |       |        | 0.2        |
| var20 |        | 0.351 |        |       |        | 0.417      |
| var21 | 0.421  |       |        |       |        | 0.227      |
| var22 | 1.03   |       |        |       |        | 0.149      |
| var23 | 1.028  |       |        |       |        | 0.161      |
| var24 | 1.01   |       |        |       |        | 0.143      |
| var25 | 0.93   |       |        |       |        | 0.244      |
| var26 | 0.823  |       |        |       |        | 0.297      |
| var27 | 0.974  |       |        |       |        | 0.265      |
| var28 | 0.387  |       |        |       |        | 0.51       |
| var29 |        |       | 0.558  |       |        | 0.68       |
| var30 |        |       | 0.836  |       |        | 0.105      |
| var31 |        |       | 0.863  |       |        | 0.105      |
| var32 |        |       | 0.83   |       |        | 0.257      |
| var33 |        |       |        | 0.8   |        | 0.429      |
| var34 |        |       | 0.568  |       |        | 0.491      |
| var35 |        |       |        | 0.772 |        | 0.5        |
| var36 |        |       |        | 0.584 |        | 0.633      |
| var37 |        |       |        | 0.462 |        |            |

## Lab- AS/NT –TS dataset

Based on eigenvalues>1

|       | Factor |       |       | Uniqueness |
|-------|--------|-------|-------|------------|
|       | 1      | 2     | 3     |            |
| var1  | 0.907  |       |       | 0.231      |
| var2  | 0.896  |       |       | 0.205      |
| var3  | 0.985  |       |       | 0.18       |
| var4  | 0.911  |       |       | 0.206      |
| var5  | 0.495  |       |       | 0.446      |
| var6  | 0.616  |       |       | 0.337      |
| var7  |        | 0.538 |       | 0.434      |
| var8  | 0.414  |       |       | 0.423      |
| var9  |        | 0.434 |       | 0.449      |
| var10 |        | 0.689 |       | 0.574      |
| var11 |        | 0.987 |       | 0.419      |
| var12 |        | 0.841 |       | 0.385      |
| var13 |        | 0.576 |       | 0.453      |
| var14 | 0.554  |       |       | 0.331      |
| var15 | 0.692  |       |       | 0.327      |
| var16 | 0.708  |       |       | 0.329      |
| var17 |        | 0.462 |       | 0.375      |
| var18 | 0.904  |       |       | 0.2        |
| var19 | 0.924  |       |       | 0.175      |
| var20 | 0.684  |       |       | 0.33       |
| var21 | 0.779  |       |       | 0.237      |
| var22 | 1.018  |       |       | 0.152      |
| var23 | 1.001  |       |       | 0.181      |
| var24 | 1.044  |       |       | 0.142      |
| var25 | 0.97   |       |       | 0.199      |
| var26 | 0.892  |       |       | 0.256      |
| var27 | 0.968  |       |       | 0.22       |
| var28 | 0.522  |       |       | 0.363      |
| var29 |        | 0.655 |       | 0.509      |
| var30 | 0.484  |       |       | 0.369      |
| var31 | 0.517  |       |       | 0.348      |
| var32 |        | 0.379 |       | 0.513      |
| var33 |        |       | 0.83  | 0.362      |
| var34 |        |       | 0.735 | 0.496      |
| var35 |        |       | 0.806 | 0.362      |
| var36 |        |       | 0.748 | 0.387      |
| var37 |        |       | 0.444 | 0.616      |

Based on number of factors expected (6)

|       | Factor |       |       |       |       |       | Uniqueness |
|-------|--------|-------|-------|-------|-------|-------|------------|
|       | 1      | 2     | 3     | 4     | 5     | 6     |            |
| var1  | 0.725  |       |       |       |       |       | 0.203      |
| var2  | 0.693  |       |       |       |       |       | 0.176      |
| var3  | 0.852  |       |       |       |       |       | 0.152      |
| var4  | 0.772  |       |       |       |       |       | 0.174      |
| var5  |        |       |       |       | 0.656 |       | 0.35       |
| var6  |        |       |       |       | 0.641 |       | 0.245      |
| var7  |        |       |       |       | 0.564 |       | 0.375      |
| var8  |        |       |       |       | 0.459 |       | 0.384      |
| var9  |        |       |       |       | 0.449 |       | 0.405      |
| var10 | 0.341  |       |       |       |       |       | 0.328      |
| var11 |        |       |       | 0.661 |       |       | 0.223      |
| var12 |        |       |       | 0.688 |       |       | 0.213      |
| var13 |        |       |       | 0.481 |       |       | 0.325      |
| var14 | 0.546  |       |       |       |       |       | 0.144      |
| var15 | 0.606  |       |       |       |       |       | 0.13       |
| var16 |        |       |       | 0.512 |       |       | 0.276      |
| var17 |        |       |       | 0.51  |       |       | 0.187      |
| var18 |        |       |       |       |       | 0.504 | 0.456      |
| var19 |        |       |       |       |       | 0.834 | 0.143      |
| var20 |        |       |       |       |       | 0.809 | 0.129      |
| var21 |        |       |       |       |       | 0.705 | 0.365      |
| var22 |        | 0.822 |       |       |       |       | 0.348      |
| var23 |        | 0.691 |       |       |       |       | 0.475      |
| var24 |        | 0.815 |       |       |       |       | 0.328      |
| var25 |        | 0.748 |       |       |       |       | 0.377      |
| var26 |        | 0.456 |       |       |       |       | 0.603      |
| var27 |        |       | 0.465 |       |       |       | 0.546      |
| var28 |        |       | 1.005 |       |       |       | 0.282      |
| var29 |        |       | 0.884 |       |       |       | 0.274      |
| var30 |        |       | 0.332 |       |       |       | 0.452      |
| var31 | 0.933  |       |       |       |       |       | 0.131      |
| var32 | 0.979  |       |       |       |       |       | 0.142      |
| var33 | 0.98   |       |       |       |       |       | 0.113      |
| var34 | 0.896  |       |       |       |       |       | 0.178      |
| var35 | 0.78   |       |       |       |       |       | 0.246      |
| var36 | 0.923  |       |       |       |       |       | 0.189      |
| var37 | 0.363  |       |       |       |       |       | 0.36       |

## Confirmatory factor analysis

No Lab- No AS/NT – No TS dataset

| Factor  | Indicator | Estimate | SE      | Z     | p       |
|---------|-----------|----------|---------|-------|---------|
| course  | var1      | 0.8647   | 0.00947 | 91.34 | < .0001 |
|         | var2      | 0.8751   | 0.00929 | 94.19 | < .0001 |
|         | var3      | 0.9956   | 0.01013 | 98.24 | < .0001 |
|         | var4      | 0.9708   | 0.01050 | 92.44 | < .0001 |
|         | var5      | 0.6621   | 0.01358 | 48.75 | < .0001 |
|         | var6      | 0.8015   | 0.01137 | 70.5  | < .0001 |
|         | var7      | 0.4513   | 0.01495 | 30.19 | < .0001 |
|         | var8      | 0.3910   | 0.01136 | 34.43 | < .0001 |
|         | var9      | 0.4874   | 0.01310 | 37.2  | < .0001 |
|         | var10     | -0.0286  | 0.00959 | -2.98 | 0.0029  |
| teacher | var13     | 0.1181   | 0.00943 | 12.52 | < .0001 |
|         | var14     | 0.6359   | 0.01133 | 56.1  | < .0001 |
|         | var22     | 0.9903   | 0.01020 | 97.11 | < .0001 |
|         | var23     | 1.1243   | 0.01127 | 99.77 | < .0001 |
|         | var24     | 1.0227   | 0.01032 | 99.05 | < .0001 |
|         | var25     | 0.9037   | 0.01060 | 85.28 | < .0001 |
|         | var26     | 0.7401   | 0.01049 | 70.58 | < .0001 |
|         | var27     | 0.9031   | 0.01070 | 84.42 | < .0001 |
| student | var28     | 0.7207   | 0.03049 | 23.64 | < .0001 |
|         | var33     | 0.5736   | 0.01146 | 50.05 | < .0001 |
|         | var34     | 0.7307   | 0.01150 | 63.55 | < .0001 |
|         | var35     | 0.7007   | 0.01198 | 58.51 | < .0001 |
|         | var36     | 0.8949   | 0.01314 | 68.12 | < .0001 |
|         | var37     | 0.5718   | 0.01319 | 43.34 | < .0001 |

# No Lab- No AS/NT – TS dataset

| Factor              | Indicator | Estimate | SE     | Z     | p       |
|---------------------|-----------|----------|--------|-------|---------|
| course              | var1      | 0.933    | 0.0142 | 65.54 | < .0001 |
|                     | var2      | 0.949    | 0.0136 | 69.57 | < .0001 |
|                     | var3      | 1.07     | 0.015  | 71.41 | < .0001 |
|                     | var4      | 1.048    | 0.0154 | 68.12 | < .0001 |
|                     | var5      | 0.693    | 0.0189 | 36.59 | < .0001 |
|                     | var6      | 0.811    | 0.0158 | 51.41 | < .0001 |
|                     | var7      | 0.558    | 0.0189 | 29.55 | < .0001 |
|                     | var8      | 0.545    | 0.0177 | 30.88 | < .0001 |
|                     | var9      | 0.564    | 0.0187 | 30.11 | < .0001 |
|                     | var10     | 0.126    | 0.0165 | 7.62  | < .0001 |
|                     | var13     | 0.466    | 0.0158 | 29.5  | < .0001 |
|                     | var14     | 0.74     | 0.0167 | 44.15 | < .0001 |
| supporting teaching | var11     | 0.188    | 0.0792 | 2.38  | 0.0175  |
|                     | var12     | 9.17     | 3.8426 | 2.39  | 0.017   |
| teacher             | var22     | 1.098    | 0.0152 | 72.42 | < .0001 |
|                     | var23     | 1.22     | 0.0163 | 74.83 | < .0001 |
|                     | var24     | 1.137    | 0.0152 | 74.75 | < .0001 |
|                     | var25     | 1.08     | 0.0158 | 68.34 | < .0001 |
|                     | var26     | 0.847    | 0.0156 | 54.31 | < .0001 |
|                     | var27     | 1.048    | 0.0157 | 66.81 | < .0001 |
|                     | var28     | 0.809    | 0.024  | 33.78 | < .0001 |
| student             | var33     | 0.638    | 0.0177 | 36.14 | < .0001 |
|                     | var34     | 0.777    | 0.0168 | 46.28 | < .0001 |
|                     | var35     | 0.748    | 0.0177 | 42.29 | < .0001 |
|                     | var36     | 0.96     | 0.0188 | 51.09 | < .0001 |
|                     | var37     | 0.687    | 0.0192 | 35.84 | < .0001 |

## No Lab- AS/NT – No TS dataset

| Factor      | Indicator | Estimate | SE      | Z      | p       |
|-------------|-----------|----------|---------|--------|---------|
| course      | var1      | 0.8646   | 0.00806 | 107.21 | < .0001 |
|             | var2      | 0.8959   | 0.00801 | 111.86 | < .0001 |
|             | var3      | 0.9855   | 0.00861 | 114.39 | < .0001 |
|             | var4      | 0.9789   | 0.00887 | 110.36 | < .0001 |
|             | var5      | 0.7093   | 0.01141 | 62.16  | < .0001 |
|             | var6      | 0.8173   | 0.00966 | 84.62  | < .0001 |
|             | var7      | 0.5466   | 0.01287 | 42.48  | < .0001 |
|             | var8      | 0.5324   | 0.01056 | 50.43  | < .0001 |
|             | var9      | 0.5719   | 0.01128 | 50.68  | < .0001 |
|             | var10     | -0.0641  | 0.00815 | -7.87  | < .0001 |
|             | var13     | 0.1059   | 0.00821 | 12.9   | < .0001 |
|             | var14     | 0.6655   | 0.00942 | 70.66  | < .0001 |
| assignments | var15     | 0.6606   | 0.00854 | 77.32  | < .0001 |
|             | var16     | 0.6468   | 0.00842 | 76.8   | < .0001 |
|             | var17     | 0.6517   | 0.01281 | 50.89  | < .0001 |
|             | var18     | 1.0345   | 0.0088  | 117.6  | < .0001 |
|             | var19     | 1.0699   | 0.00883 | 121.13 | < .0001 |
|             | var20     | 0.9452   | 0.01217 | 77.67  | < .0001 |
|             | var21     | 0.8918   | 0.00909 | 98.15  | < .0001 |
| teacher     | var22     | 1.002    | 0.0087  | 115.12 | < .0001 |
|             | var23     | 1.1186   | 0.00947 | 118.09 | < .0001 |
|             | var24     | 1.0504   | 0.00882 | 119.07 | < .0001 |
|             | var25     | 0.8901   | 0.00871 | 102.24 | < .0001 |
|             | var26     | 0.7359   | 0.00836 | 88.02  | < .0001 |
|             | var27     | 0.8764   | 0.00869 | 100.79 | < .0001 |
| student     | var37     | 0.6238   | 0.01262 | 49.44  | < .0001 |
|             | var36     | 0.8453   | 0.0111  | 76.19  | < .0001 |
|             | var35     | 0.5052   | 0.00821 | 61.51  | < .0001 |
|             | var34     | 0.6909   | 0.00941 | 73.42  | < .0001 |
|             | var33     | 0.4751   | 0.00901 | 52.72  | < .0001 |

## No Lab- AS/NT – TS dataset

### Factor Loadings

| Factor              | Indicator | Estimate | SE      | Z     | p       |
|---------------------|-----------|----------|---------|-------|---------|
| course              | var1      | 1.018    | 0.00718 | 141.7 | < .0001 |
|                     | var2      | 1.041    | 0.00707 | 147.2 | < .0001 |
|                     | var3      | 1.117    | 0.00754 | 148.3 | < .0001 |
|                     | var4      | 1.102    | 0.00757 | 145.7 | < .0001 |
|                     | var5      | 0.887    | 0.00864 | 102.7 | < .0001 |
|                     | var6      | 0.997    | 0.00789 | 126.3 | < .0001 |
|                     | var7      | 0.785    | 0.00903 | 87    | < .0001 |
|                     | var8      | 0.809    | 0.00869 | 93.1  | < .0001 |
|                     | var9      | 0.824    | 0.00879 | 93.8  | < .0001 |
|                     | var10     | 0.483    | 0.0087  | 55.6  | < .0001 |
|                     | var13     | 0.702    | 0.00831 | 84.5  | < .0001 |
|                     | var14     | 0.893    | 0.00815 | 109.6 | < .0001 |
| supporting teaching | var11     | 1.232    | 0.0153  | 80.5  | < .0001 |
|                     | var12     | 1.721    | 0.01711 | 100.6 | < .0001 |
| assignments         | var15     | 0.978    | 0.00777 | 125.8 | < .0001 |
|                     | var16     | 0.985    | 0.00783 | 125.7 | < .0001 |
|                     | var17     | 0.914    | 0.00916 | 99.8  | < .0001 |
|                     | var18     | 1.192    | 0.00773 | 154.2 | < .0001 |
|                     | var19     | 1.203    | 0.00778 | 154.7 | < .0001 |
|                     | var20     | 1.119    | 0.00923 | 121.2 | < .0001 |
|                     | var21     | 1.11     | 0.00798 | 139.1 | < .0001 |
| TEACHER             | var22     | 1.164    | 0.00762 | 152.8 | < .0001 |
|                     | var23     | 1.236    | 0.0081  | 152.5 | < .0001 |
|                     | var24     | 1.178    | 0.00758 | 155.4 | < .0001 |
|                     | var25     | 1.096    | 0.00757 | 144.8 | < .0001 |
|                     | var26     | 0.984    | 0.00766 | 128.4 | < .0001 |
|                     | var27     | 1.097    | 0.00779 | 140.9 | < .0001 |
|                     | var28     | 0.93     | 0.00955 | 97.4  | < .0001 |
| student             | var33     | 0.739    | 0.00763 | 96.9  | < .0001 |
|                     | var34     | 0.851    | 0.00755 | 112.7 | < .0001 |
|                     | var35     | 0.791    | 0.00739 | 107.1 | < .0001 |
|                     | var36     | 0.955    | 0.00867 | 110.3 | < .0001 |
|                     | var37     | 0.8      | 0.01097 | 72.9  | < .0001 |
| supporting teaching | var11     | 1.232    | 0.0153  | 80.5  | < .0001 |
|                     | var12     | 1.721    | 0.01711 | 100.6 | < .0001 |

## Lab- No AS/NT – No TS dataset

### Factor Loadings

| Factor  | Indicator | Estimate | SE     | Z     | p       |
|---------|-----------|----------|--------|-------|---------|
| course  | var1      | 0.8993   | 0.0181 | 49.7  | < .0001 |
|         | var2      | 0.8275   | 0.0171 | 48.27 | < .0001 |
|         | var3      | 1.0459   | 0.0192 | 54.56 | < .0001 |
|         | var4      | 1.0164   | 0.0193 | 52.59 | < .0001 |
|         | var5      | 0.5525   | 0.0234 | 23.66 | < .0001 |
|         | var6      | 0.7394   | 0.0199 | 37.08 | < .0001 |
|         | var7      | 0.4747   | 0.0274 | 17.3  | < .0001 |
|         | var8      | 0.3818   | 0.0226 | 16.88 | < .0001 |
|         | var9      | 0.4223   | 0.025  | 16.9  | < .0001 |
|         | var10     | -0.1362  | 0.017  | -7.99 | < .0001 |
|         | var13     | 0.0708   | 0.016  | 4.42  | < .0001 |
|         | var14     | 0.6132   | 0.0213 | 28.78 | < .0001 |
| teacher | var22     | 1.0311   | 0.0191 | 54.12 | < .0001 |
|         | var23     | 1.1839   | 0.0213 | 55.6  | < .0001 |
|         | var24     | 1.0796   | 0.0199 | 54.32 | < .0001 |
|         | var25     | 1.0147   | 0.0213 | 47.71 | < .0001 |
|         | var26     | 0.7701   | 0.0201 | 38.38 | < .0001 |
|         | var27     | 0.9939   | 0.0212 | 46.99 | < .0001 |
|         | var28     | 0.497    | 0.0606 | 8.2   | < .0001 |
| lab     | var29     | 0.4867   | 0.0221 | 22.03 | < .0001 |
|         | var30     | 1.1539   | 0.0213 | 54.07 | < .0001 |
|         | var31     | 1.2135   | 0.0212 | 57.22 | < .0001 |
|         | var32     | 0.9495   | 0.0258 | 36.86 | < .0001 |
| student | var33     | 0.6293   | 0.0218 | 28.84 | < .0001 |
|         | var34     | 0.6314   | 0.0274 | 23.01 | < .0001 |
|         | var35     | 0.6177   | 0.0217 | 28.47 | < .0001 |
|         | var36     | 0.7534   | 0.027  | 27.87 | < .0001 |
|         | var37     | 0.4755   | 0.0262 | 18.18 | < .0001 |

## Lab- No AS/NT – TS dataset

### Factor Loadings

| Factor              | Indicator | Estimate | SE     | Z     | p       |
|---------------------|-----------|----------|--------|-------|---------|
| course              | var1      | 0.9785   | 0.0301 | 32.55 | < .0001 |
|                     | var2      | 0.95     | 0.0281 | 33.84 | < .0001 |
|                     | var3      | 1.1471   | 0.0321 | 35.78 | < .0001 |
|                     | var4      | 1.136    | 0.0336 | 33.77 | < .0001 |
|                     | var5      | 0.6727   | 0.0398 | 16.89 | < .0001 |
|                     | var6      | 0.7735   | 0.034  | 22.72 | < .0001 |
|                     | var7      | 0.4222   | 0.0429 | 9.83  | < .0001 |
|                     | var8      | 0.4703   | 0.0364 | 12.92 | < .0001 |
|                     | var9      | 0.5825   | 0.0379 | 15.35 | < .0001 |
|                     | var10     | 0.0774   | 0.0324 | 2.39  | 0.017   |
|                     | var13     | 0.3434   | 0.0333 | 10.32 | < .0001 |
|                     | var14     | 0.7084   | 0.034  | 20.86 | < .0001 |
| supporting teaching | var11     | 0.8054   | 0.0693 | 11.62 | < .0001 |
|                     | var12     | 2.0678   | 0.1298 | 15.93 | < .0001 |
| teacher             | var22     | 1.1744   | 0.032  | 36.65 | < .0001 |
|                     | var23     | 1.2751   | 0.0346 | 36.83 | < .0001 |
|                     | var24     | 1.2268   | 0.0336 | 36.51 | < .0001 |
|                     | var25     | 1.0916   | 0.0333 | 32.75 | < .0001 |
|                     | var26     | 0.9173   | 0.035  | 26.18 | < .0001 |
|                     | var27     | 1.0824   | 0.0336 | 32.17 | < .0001 |
|                     | var28     | 0.7228   | 0.0533 | 13.57 | < .0001 |
| lab                 | var29     | 0.5799   | 0.036  | 16.13 | < .0001 |
|                     | var30     | 1.2284   | 0.0355 | 34.63 | < .0001 |
|                     | var31     | 1.2322   | 0.0356 | 34.6  | < .0001 |
|                     | var32     | 0.8901   | 0.042  | 21.2  | < .0001 |
| student             | var33     | 0.7744   | 0.0341 | 22.72 | < .0001 |
|                     | var34     | 0.5736   | 0.0387 | 14.83 | < .0001 |
|                     | var35     | 0.764    | 0.0351 | 21.77 | < .0001 |
|                     | var36     | 0.8221   | 0.0388 | 21.2  | < .0001 |
|                     | var37     | 0.6609   | 0.0426 | 15.52 | < .0001 |

## Lab- AS/NT – No TS dataset

### Factor Loadings

| Factor      | Indicator | Estimate | SE     | Z     | p       |
|-------------|-----------|----------|--------|-------|---------|
| course      | var1      | 0.8851   | 0.0138 | 64.35 | < .0001 |
|             | var2      | 0.8926   | 0.0136 | 65.67 | < .0001 |
|             | var3      | 1.0223   | 0.0148 | 69.07 | < .0001 |
|             | var4      | 1.0168   | 0.015  | 67.84 | < .0001 |
|             | var5      | 0.7159   | 0.0183 | 39.14 | < .0001 |
|             | var6      | 0.8295   | 0.0168 | 49.42 | < .0001 |
|             | var7      | 0.5679   | 0.0216 | 26.31 | < .0001 |
|             | var8      | 0.4934   | 0.0175 | 28.26 | < .0001 |
|             | var9      | 0.5141   | 0.0186 | 27.69 | < .0001 |
|             | var10     | -0.1014  | 0.0132 | -7.66 | < .0001 |
|             | var13     | 0.0871   | 0.0131 | 6.65  | < .0001 |
|             | var14     | 0.6916   | 0.0163 | 42.34 | < .0001 |
| assignments | var15     | 0.7186   | 0.0149 | 48.18 | < .0001 |
|             | var16     | 0.72     | 0.0151 | 47.84 | < .0001 |
|             | var17     | 0.715    | 0.0218 | 32.78 | < .0001 |
|             | var18     | 1.0869   | 0.0156 | 69.89 | < .0001 |
|             | var19     | 1.1368   | 0.0157 | 72.53 | < .0001 |
|             | var20     | 0.9808   | 0.0201 | 48.74 | < .0001 |
|             | var21     | 0.9577   | 0.0157 | 60.86 | < .0001 |
| teacher     | var22     | 1.0311   | 0.0151 | 68.19 | < .0001 |
|             | var23     | 1.115    | 0.0159 | 70.12 | < .0001 |
|             | var24     | 1.0572   | 0.015  | 70.6  | < .0001 |
|             | var25     | 0.9338   | 0.0148 | 62.96 | < .0001 |
|             | var26     | 0.8152   | 0.0149 | 54.74 | < .0001 |
|             | var27     | 0.9573   | 0.0151 | 63.53 | < .0001 |
|             | var28     | 0.7776   | 0.0349 | 22.27 | < .0001 |
| lab         | var29     | 0.5507   | 0.0176 | 31.25 | < .0001 |
|             | var30     | 1.212    | 0.0165 | 73.27 | < .0001 |
|             | var31     | 1.2419   | 0.0168 | 73.79 | < .0001 |
|             | var32     | 1.0284   | 0.0193 | 53.2  | < .0001 |
| student     | var33     | 0.5904   | 0.0153 | 38.63 | < .0001 |
|             | var34     | 0.581    | 0.0207 | 28.00 | < .0001 |
|             | var35     | 0.509    | 0.014  | 36.44 | < .0001 |
|             | var36     | 0.7132   | 0.019  | 37.59 | < .0001 |
|             | var37     | 0.5043   | 0.0235 | 21.46 | < .0001 |

## Lab- AS/NT –TS dataset

| Factor Loadings                     |          |          |        |      |         |
|-------------------------------------|----------|----------|--------|------|---------|
| Factor                              | Variable | Estimate | SE     | Z    | p-value |
| Course                              | var1     | 1.075    | 0.0145 | 74.2 | < .0001 |
|                                     | var2     | 1.083    | 0.0140 | 77.1 | < .0001 |
|                                     | var3     | 1.162    | 0.0152 | 76.5 | < .0001 |
|                                     | var4     | 1.152    | 0.0152 | 75.8 | < .0001 |
|                                     | var5     | 0.938    | 0.0174 | 54.0 | < .0001 |
|                                     | var6     | 1.015    | 0.0158 | 64.1 | < .0001 |
|                                     | var7     | 0.867    | 0.0186 | 46.7 | < .0001 |
|                                     | var8     | 0.862    | 0.0168 | 51.2 | < .0001 |
|                                     | var9     | 0.855    | 0.0170 | 50.1 | < .0001 |
|                                     | var10    | 0.442    | 0.0164 | 26.9 | < .0001 |
|                                     | var13    | 0.689    | 0.0167 | 41.3 | < .0001 |
|                                     | var14    | 0.964    | 0.0162 | 59.4 | < .0001 |
| Supporting teaching (if applicable) | var11    | 0.596    | 0.0233 | 25.6 | < .0001 |
|                                     | var12    | 0.882    | 0.0225 | 39.2 | < .0001 |
| Assignments (if applicable)         | var15    | 1.016    | 0.0154 | 66.0 | < .0001 |
|                                     | var16    | 1.026    | 0.0154 | 66.8 | < .0001 |
|                                     | var17    | 0.975    | 0.0183 | 53.3 | < .0001 |
|                                     | var18    | 1.271    | 0.0158 | 80.5 | < .0001 |
|                                     | var19    | 1.290    | 0.0158 | 81.7 | < .0001 |
|                                     | var20    | 1.176    | 0.0181 | 64.8 | < .0001 |
|                                     | var21    | 1.183    | 0.0162 | 73.1 | < .0001 |
| Teaching staff                      | var22    | 1.220    | 0.0153 | 79.8 | < .0001 |
|                                     | var23    | 1.274    | 0.016  | 79.6 | < .0001 |
|                                     | var24    | 1.247    | 0.0152 | 81.9 | < .0001 |
|                                     | var25    | 1.165    | 0.0155 | 75.1 | < .0001 |
|                                     | var26    | 1.071    | 0.0154 | 69.7 | < .0001 |
|                                     | var27    | 1.172    | 0.0156 | 75.0 | < .0001 |
| Laboratory (if applicable)          | var28    | 0.984    | 0.0196 | 50.1 | < .0001 |
|                                     | var29    | 0.750    | 0.0177 | 42.5 | < .0001 |
|                                     | var30    | 1.260    | 0.0158 | 79.6 | < .0001 |
|                                     | var31    | 1.282    | 0.0159 | 80.8 | < .0001 |
|                                     | var32    | 1.057    | 0.0184 | 57.3 | < .0001 |
| Student self-assessment             | var33    | 0.842    | 0.0152 | 55.4 | < .0001 |
|                                     | var34    | 0.778    | 0.0171 | 45.4 | < .0001 |
|                                     | var35    | 0.812    | 0.0146 | 55.8 | < .0001 |
|                                     | var36    | 0.891    | 0.0163 | 54.7 | < .0001 |
|                                     | var37    | 0.735    | 0.0215 | 34.2 | < .0001 |
